## 1 **Mask mandate and use efficacy in state-level COVID-19 containment**

2

3 Damian D. Guerra<sup>1,\*</sup> and Daniel J. Guerra<sup>2</sup>

4

5 1. Department of Biology, University of Louisville, Louisville, Kentucky, United States of America

6 2. Authentic Biochemistry, VerEvMed, Clarkston, Washington, United States of America

7

8 \* Corresponding author ([damian.guerra@louisville.edu](mailto:damian.guerra@louisville.edu))

9

### 10 **Abstract**

11 *Background:* Containment of the COVID-19 pandemic requires evidence-based strategies to reduce transmission.

12 Because COVID-19 can spread via respired droplets, many states have mandated mask use in public settings.

13 Randomized control trials have not clearly demonstrated mask efficacy against respiratory viruses, and

14 observational studies conflict on whether mask use predicts lower infection rates. We hypothesized that statewide

15 mask mandates and mask use are associated with lower COVID-19 case growth rates in the United States.

16 *Methods:* We calculated total COVID-19 case growth and mask use for the continental United States with data from

17 the Centers for Disease Control and Prevention and Institute for Health Metrics and Evaluation. We estimated post-

18 mask mandate case growth in non-mandate states using median issuance dates of neighboring states with mandates.

19 *Results:* Case growth was not significantly different between mandate and non-mandate states at low or high

20 transmission rates, and surges were equivocal. Mask use predicted lower case growth at low, but not high

21 transmission rates. Growth rates were comparable between states in the first and last mask use quintiles adjusted for

22 normalized total cases early in the pandemic and unadjusted after peak Fall-Winter infections. Mask use did not

23 predict Summer 2020 case growth for non-Northeast states or Fall-Winter 2020 growth for all continental states.

24 *Conclusions:* Mask mandates and use are not associated with slower state-level COVID-19 spread during COVID-

25 19 growth surges. Containment requires future research and implementation of existing efficacious strategies.

26

27 **Keywords:** COVID-19, SARS-CoV-2, face covering, medical mask, mask mandate, nonpharmaceutical intervention

## 28 Introduction

29 Since being linked to SARS-CoV-2 in early 2020, COVID-19 has increased mortality and induced  
30 socioeconomic upheaval worldwide [1]. Typical COVID-19 symptoms mirror influenza, with loss of taste  
31 and smell being differential indicators [2]. Age, obesity, cardiovascular disease, and diabetes are  
32 associated with severe COVID-19 symptoms (e.g., pneumonia, blood clots, cytokine storm) and hence  
33 higher risks of hospitalization and death [3, 4]. Given the incidence of comorbidities, evidence-based  
34 containment strategies are warranted. Respirated droplets and aerosols containing SARS-CoV-2 are  
35 intuitively likely modes of community transmission [5]. To reduce COVID-19 spread, governments have  
36 issued mandates to wear medical masks or cloth face coverings (henceforth *masks*) in public settings. 40  
37 of the United States have issued mask mandates since April 2020. Mask mandates have limited precedent,  
38 making efficacy unclear. Therefore, our first objective was to evaluate the efficacy of mask mandates in  
39 attenuating COVID-19 case growth at the state level.

40  
41 Prior studies have conflicted on whether masks reduce SARS-CoV-2 transmission. For USS Theodore  
42 Roosevelt crew, reported mask use was lower among COVID-19 cases (56% vs. 81%) [2]. There were no  
43 infections for 47.9% of patrons of two hair stylists with COVID-19 with universal masking [6], but PCR  
44 tests were not obtained for the other 52.1% of patrons [6], and first wave COVID-19 hospitalizations were  
45 no higher in public schools (high density with minimal masking) than elsewhere in Sweden [7]. A  
46 randomized controlled trial (RCT) of Danish volunteers found no protective benefit of medical masks  
47 against COVID-19 infection [8]. In RCTs before COVID-19, viral infections were more common for  
48 Vietnamese clinicians with cloth masks than medical or no masks (which were indistinguishable from  
49 each other) [9], and N-95 respirators (but not medical masks) protected Beijing clinicians from bacterial  
50 and viral diseases compared to no masks [10]. To be sure, mask use compliance in RCTs is not always  
51 clear [11]. Mask use was 10% and 33% for Beijing households with and without intrahousehold COVID-  
52 19 transmission, respectively [12]. This suggests greater mask use may reduce COVID-19 spread. Hence,

53 our second objective was to assess whether COVID-19 case growth is negatively associated with mask  
54 use.

55  
56 Earlier studies have not compared COVID-19 case growth rates in states with and without mandates, and  
57 effects of compliance (proportion of people masked) are not clear. We assessed if statewide mask  
58 mandates and compliance predict (and thus potentially decrease) statewide COVID-19 growth rates after  
59 1 June 2020, when test capacity reached a threshold for minimal contact tracing [13]. We found little to  
60 no association between COVID-19 case growth and mask mandates or mask use at the state level. These  
61 findings suggest that statewide mandates and enhanced mask use did not detectably slow COVID-19  
62 spread. We conclude by affirming the need for evidence-based strategies to minimize COVID-19 related  
63 morbidity and mortality and briefly discussing mechanisms of spread.

64

## 65 **Materials and methods**

### 66 *Data Sources and Terms*

67 We obtained total COVID-19 cases up to 6 March 2021 for the 50 United States from the Centers for  
68 Disease Control and Prevention (CDC) [14]. Total cases include confirmed and probable cases as defined  
69 by the Council of State and Territorial Epidemiologists. Briefly, confirmed cases require PCR  
70 amplification of SARS-CoV-2 RNA from a patient specimen. Probable cases require one of the  
71 following: clinical and epidemiologic evidence, clinical or epidemiologic evidence supported by COVID-  
72 19 antigen detection in respiratory specimens, or vital records listing COVID-19 as contributing to death.  
73 Statewide mask mandates were emergency executive public health orders that require nose and mouth  
74 coverings in public settings (including but not limited to retail locations) in more than 50% of counties  
75 within a state [15, 16]. Mandate issuance dates were obtained from state health departments and press  
76 releases. Early and late mandates were issued before and after 2 August 2020, respectively. Non-mandate  
77 states did not have statewide orders as of 6 March 2021.

78 Mask use is defined as the percentage of people who always wear masks in public settings. We assessed  
79 mask use with the University of Washington Institute for Health Metrics and Evaluation (IHME) COVID-  
80 19 model site [17], which estimates mask wearing from Premise, the Facebook Global Symptom Survey  
81 (University of Maryland), the Kaiser Family Foundation, and the YouGov Behavior Tracker Survey.  
82 To identify regional patterns of COVID-19 case growth, we grouped states into five categories: Northeast  
83 (Connecticut, Delaware, Massachusetts, Maryland, Maine, New Hampshire, New Jersey, New York,  
84 Pennsylvania, Rhode Island, and Vermont); Midwest (Illinois, Indiana, Iowa, Kentucky, Kansas,  
85 Michigan, Minnesota, Missouri, Ohio, West Virginia, Wisconsin); Mountains-Plains (Colorado, Idaho,  
86 Montana, Nebraska, New Mexico, North Dakota, Oklahoma, South Dakota, Utah, Wyoming); South  
87 (Alabama, Arkansas, Florida, Georgia, Louisiana, Mississippi, North Carolina, South Carolina,  
88 Tennessee, Texas, Virginia); and Pacific (Alaska, Arizona, California, Hawaii, Nevada, Oregon,  
89 Washington).

90

#### 91 *Parameter Derivation*

92 We calculated COVID-19 case parameters from total cases per 100,000 state residents (normalized total  
93 cases; **Worksheet A in S1 Table**). As infectious diseases such as COVID-19 exhibit exponential growth,  
94 we used logarithmic transformation to quantify daily case growth as shown elsewhere [15, 18]:

$$95 \frac{\text{case growth}}{\text{day}} = 100 * \left( \ln \frac{C_x}{C_{x-1}} \right)$$

96 Where  $C_x$  is normalized cases on a particular day and  $C_{x-1}$  is normalized cases on the prior day. To reduce  
97 effects of reporting lags, we used a 7-day simple moving mean.

98 For each state, growth minima and maxima were the 20-day mean lowest and highest cases/day between  
99 the end of the Summer infection wave and the height of the Fall-Winter infection wave. *Surge* refers to  
100 the difference between maximal and minimal growth rates (the magnitude of growth rate increase) for  
101 each state. *Surge rate* refers to the speed at which case growth increased from minimal to maximal levels  
102 for each state (Surge/days between minima and maxima), normalized to the mean surge rate for all states.

103 Cases or masks at minima and maxima were the 20-day mean number of cases/100,000 state residents or  
104 mask use for each state at its growth extrema. Change in masks refers to the percent increase in mask use  
105 between extrema for each state.

106 To model post-mask mandate case growth in the 48 contiguous states (excluding Alaska and Hawaii), we  
107 calculated the difference of natural logarithms of normalized total cases between 6 March 2021 ( $C_{306}$ ) and  
108 the date of mandate issuance ( $C_M$ ) for each state with an early mandate:

$$109 \quad \textit{Post Mandate Growth} = \ln \frac{C_{306}}{C_M}$$

110 For states with late or no mandates, effective dates were modeled as medians of issuance dates among  
111 bordering states with early mandates. For example, the effective mandate issuance date of Tennessee was  
112 the median of issuance dates among the early mandate states Kentucky, Arkansas, Alabama, North  
113 Carolina, and Virginia.

114 We reported mask use for Summer (1 June-1 Oct 2020) and Fall-Winter (1 Oct 2020-1 Mar 2021) as  
115 mean mask use during these periods for each state. Cases on 1 June or 1 Oct were the 20-day mean  
116 number of cases/100,000 on these two dates. Summer and Fall-Winter case growth were defined as  
117 differences of natural logarithms of normalized total cases at the beginning and end of each period:

$$118 \quad \textit{Summer Growth} = \ln \frac{C_{1001}}{C_{601}} \quad \textit{Fall/Winter Growth} = \ln \frac{C_{301}}{C_{1001}}$$

119

## 120 *Statistics*

121 We used Prism 9.1 (GraphPad; San Diego, CA) to construct figures and perform null hypothesis  
122 significance tests (**Worksheet D in S1 Table**). The significance threshold for all tests was  $p < \alpha=0.05$ . All  
123 datapoints are state-level values, and we performed D'Agostino-Pearson tests to assess normality of  
124 residuals.

125 To evaluate mask mandate efficacy, we performed two-tailed, two-sample t-tests (early vs. no mandates)  
126 or ordinary one-way ANOVA with Holm-Šídák posttests (early vs. late vs. no mandates) and used  
127 Welch's correction for heteroscedastic data. For non-normal data, we performed Mann-Whitney U tests

128 (early vs. no mandates) or Kruskal-Wallis with Dunn posttests (early vs. late vs. no mandates). This  
129 decision tree conforms with recommended practices for datasets with  $N > 5$  [19]. Hawaii was excluded  
130 because its dates of extrema deviated from those of continental US states. Alaska and Hawaii were  
131 excluded from post-mandate case growth assessment because they lack contiguous US border states.  
132 To determine top and bottom mask use quintiles, we ranked mean mask use among states (excluding  
133 Hawaii) from 1 June 2020 to 1 March 2021. For t tests comparing top and bottom quintiles, we assessed  
134 days between the indicated normalized case totals and mean mask use over this interval for each state.  
135 To evaluate mask use efficacy at and between extrema, we performed simple linear regressions with null  
136 hypotheses of zero slope. We similarly evaluated mask use efficacy during the Summer and Fall-Winter  
137 infection waves. For the Summer wave, Northeast states were excluded because they deviated from other  
138 states with respect to covariation between normalized cases and growth. For the Fall-Winter wave,  
139 Hawaii was excluded because it deviated from other states with respect to covariation between  
140 normalized cases and growth. Infectious disease research commonly uses OLS [20, 21], with simple  
141 linear and simple ln-linear models reported in recent COVID-19 studies [22, 23]. We used ordinary least  
142 squares (OLS) for homoscedastic data and weighted least squares (WLS) for heteroscedastic data, as  
143 determined by the GraphPad Prism Test for Homoscedasticity. Regardless of statistical significance,  $R^2$   
144 values denote coefficients of determination for lines of best fit with unconstrained slopes.

145

## 146 **Results**

### 147 *COVID-19 growth rates vary with time*

148 Normalized COVID-19 cases increased more than 1500-fold from March 2020 to March 2021 in the  
149 United States [14]. To identify patterns of COVID-19 spread, we quantified case growth for each of the  
150 50 US States (**Worksheet B in S1 Table**). Natural log (Ln)-linear plots revealed six phases of COVID-19  
151 growth up to 6 March 2021: first wave (before May 2020), first minimum (May-June 2020), Summer

152 wave maximum (June-August 2020), second minimum (August-October 2020), Fall-Winter wave  
153 maximum (October-January 2020), and third minimum (March 2021) (**S1-3 Figs**).

154

155 *Mandates are not associated with state COVID-19 case growth*

156 We next assessed associations between mask mandates and case growth. 33 US states issued statewide  
157 mask mandates on or before 2 August 2020 (early), when case growth was low, while 7 other states  
158 issued mandates after this date (late). We observed a six-phase pattern in states with early (**S1 Fig**), late  
159 (**S2 Fig**), and no mask mandates (**S3 Fig**). This suggests qualitatively comparable courses of viral spread  
160 among states regardless of mask mandates.

161

162 A recent study reported negative association between statewide mask mandates and subsequent COVID-  
163 19 log growth rates [15]. We hypothesized that case growth would be lower in states with mandates. 64%  
164 of early state mandates were issued during the Summer wave, which precluded determination of whether  
165 mandates were associated with lower Summer wave case growth. We therefore examined case growth  
166 after mandate issuance during the second minimum and the Fall-Winter wave maximum (henceforth  
167 *minimum* and *maximum*) (**Fig 1A**). Hawaii was excluded because its minimum and maximum did not  
168 chronologically align with continental states. Average Fall-Winter mask use was ~10% higher in early  
169 mandate states than in late and no mandate states (Holm-Šídák  $p \leq 0.001$ ; **Fig 1B**), confirming that  
170 mandates promote greater mask use. Contrary to our hypothesis, early mandates were not associated with  
171 lower minimum case growth (Mann-Whitney  $p = 0.087$ ; **Fig 1C**). Maximum case growth was the same  
172 among states with early, late, and no mandates (ANOVA  $p = 0.29$ ; **Fig 1D**). This indicates that mask  
173 mandates were not predictive of slower COVID-19 spread when community transmission rates were low  
174 or high. We wondered if mask mandates were associated with smaller or slower surges in case growth.  
175 Differences between minimum and maximum case growth were similar among early, late, and no  
176 mandate states (ANOVA  $p = 0.12$ ; **Fig 1E**), and surges from minimum to maximum growth occurred at

177 similar rates (ANOVA  $p=0.16$ ; **Fig 1F**). These findings suggest that mask mandates are not predictive of  
178 smaller or slower shifts from low to high case growth.

179  
180 Normalized COVID-19 cases as of 6 March 2021 were 18.6% lower in states with early mandates than  
181 states without mandates (Holm-Šídák  $p=0.036$ ), but early mandates were issued over a range of dates (15  
182 April to 2 August 2020). To assess how early mandates relate to cumulative cases, we calculated  
183 normalized case growth for contiguous states between early mandate issuance and 6 March 2021. For  
184 states with late and no mandates, we expressed effective dates (when states could have reasonably issued  
185 mandates) as median dates of neighboring early mandate states. We expected to find lower case growth  
186 among early mandate states. Surprisingly, normalized case growth after mandates (actual and effective)  
187 were indistinguishable among state groups (ANOVA  $p=0.93$ ; **Fig 2A**). Moreover, growth curves after  
188 actual and effective mandates were not distinguishable among state groups at any date between mandate  
189 issuance and 6 March 2021 (**Fig 2B**). Together, these data do not support an association between  
190 statewide mandates and COVID-19 spread.

191  
192 *Mask use is not associated with most state COVID-19 case growth*

193 We speculated that statewide mask use, rather than mask mandates per se, may predict COVID-19 case  
194 growth. The University of Washington IHME provides robust estimates for mask use (defined as the  
195 percentage of people who always wear masks in public settings) [17]. Mask use was associated with  
196 lower minimum case growth (WLS  $p<0.0001$ ; **Fig 3A**), but not normalized total cases at minima (OLS  
197  $p=0.54$ ; **S4 Fig**). States with the highest first wave normalized cases and July 2020 seroprevalence were  
198 primarily in the Northeast [14, 24], which could explain the lack of Summer growth in these states.  
199 Excluding Northeast states, normalized cases predicted lower minimum case growth (WLS  $p=0.001$ ; **S4**  
200 **Fig**). Eight Northeast states were among the 10 states with highest mean mask use [17]. Intriguingly,  
201 normalized cases grew from 400 to 1350 per 100,000 at similar rates between the first and last 10 states  
202 for mask use (unpaired t test  $p=0.49$ ), albeit ~50 days later for the last 10 states (**Fig 3B**). These findings



203 suggest the link between masks and minimum growth may be an artifact of the tendency for faster case  
204 growth to occur at lower case prevalence. In support of this, we found no association between mask use  
205 and case growth at maxima (OLS  $p=0.11$ ; **Fig 3C**), when case prevalence differences were smaller among  
206 states. There was also no association between mask use and normalized cases at maxima (OLS  $p=0.073$ ;  
207 **S5 Fig**), although residuals were slightly non-normal. The 10 states with highest and lowest mask use  
208 exhibited indistinguishable growth rates from 0 to 80 days after maxima (Mann-Whitney  $p=0.85$ ; **Fig**  
209 **3D**), and higher normalized cases predicted lower maximum growth rates among continental states (OLS  
210  $p<0.0001$ ; **S5 Fig**). While there was unexpected weak association between mask use and surge size (OLS  
211  $p=0.03$ ; **Fig 3E**), mask use at minima did not predict surge rate (OLS  $p=0.69$ ; **Fig 3F**). Together, these  
212 data suggest that mask use is a poor predictor of COVID-19 growth at the state level.

213

214 *Mask use does not predict Summer and Fall-Winter statewide COVID-19 case totals.*

215 Greater statewide mask use could predict fewer cumulative cases during a growth wave. We tested this by  
216 calculating COVID-19 case growth during Summer and Fall-Winter waves (**Fig 4A-B**). Summer wave  
217 growth differed notably between Northeast and all other states; excluding the Northeast, greater  
218 normalized cases on 1 Jun 2020 predicted lower Summer growth (OLS  $p<0.0001$ ; **Fig 4C**). By contrast,  
219 normalized cases on 1 October 2020 predicted Fall-Winter growth for Northeast and all other states (WLS  
220  $p<0.0001$ ; **Fig 4D**). Excluding Northeast states, masks were not associated with lower Summer growth  
221 between 1 June and 1 October 2020 (OLS  $p=0.27$ ; **Fig 4E**). We likewise found no association between  
222 mask use and Fall-Winter growth between 1 October 2020 and 1 March 2021 (OLS  $p=0.93$ ; **Fig 4F**).  
223 These data indicate that mask use does not predict Summer wave or Fall-Winter wave growth at the state  
224 level and that low Summer growth in Northeast states did not predict low Fall-Winter growth. We  
225 conclude that statewide SARS-CoV-2 transmission waves are independent of reported mask use [17].

226

227

## 228 **Discussion**

229 Our main finding is that mask mandates and use are not associated with lower SARS-CoV-2 spread  
230 among US states. 80% of US states mandated masks during the COVID-19 pandemic. Mandates induced  
231 greater mask compliance but did not predict lower growth rates when community spread was low  
232 (minima) or high (maxima). We infer that mandates likely did not affect COVID-19 case growth [15], as  
233 growth rates were similar on all days between actual or modeled issuance dates and 6 March 2021. Higher  
234 mask use (rather than mandates per se) has been argued to decrease COVID-19 growth rates [11]. While  
235 compliance varies by location and time, IHME estimates are robust (derived from multiple sources [17])  
236 and densely sampled (day-level precision). Higher mask use did not predict lower maximum growth rates,  
237 smaller surges, or less Fall-Winter growth among continental states. Mask-growth rate correlation was  
238 only evident at minima. This may be an artifact of faster growth at fewer normalized cases, as well as  
239 regional differences in case prevalence early in the pandemic. States in the high mask quintile grew at  
240 similar rates as states in the low mask quintile after maxima (when interstate total case differences were  
241 smaller than before minima). In addition, mask use did not predict normalized cases at minima, and low  
242 mask growth curves trailed those of high mask (particularly Northeast) states before minima. Growth  
243 maxima and Fall-Winter surges did not differ between Northeast and other states. Northeast states  
244 exhibited the highest seroprevalence up to at least July 2020 [24] and constituted 80% of the top quintile  
245 of mask use, which may explain their comparatively lower Summer growth. Overall, mask use appears to  
246 be an intra-state lagging indicator of case growth.

247  
248 There is inferential but not demonstrable evidence that masks reduce SARS-CoV-2 transmission. Animal  
249 models [25], small case studies [6], and growth curves for mandate-only states [16] suggest that mask  
250 efficacy increases with mask use [11]. However, we did not observe lower growth rates over a range of  
251 compliance at maximum Fall-Winter growth (45-83% between South Dakota and Massachusetts during  
252 maxima) [17] when growth rates were high. This complements a Danish RCT from 3 April to 2 June

253 2020, when growth rates were low, which found no association between mask use and lower COVID-19  
254 rates either for all participants in the masked arm (47% strong compliance) or for strongly compliant  
255 participants only [8]. Masks have generally not protected against other respiratory viruses. Higher self-  
256 reported mask use protected against SARS-CoV-1 in Beijing residents [26], but RCTs found no  
257 differences in PCR confirmed influenza among Hong Kong households assigned to hand hygiene with or  
258 without masks (mask use 31% and 49%, respectively) [27]. Medical and cloth masks did not reduce viral  
259 respiratory infections among clinicians in Vietnam [9] or China [10], and rhinovirus transmission  
260 increased among universally masked Hong Kong students and teachers in 2020 compared with prior years  
261 [28]. These findings are consistent with a 2020 CDC meta-analysis [29] and a 2020 Cochrane review  
262 update [30].

263  
264 Our study has implications for respiratory virus mitigation. Public health measures should ethically  
265 promote behaviors that prevent communicable diseases. The sudden onset of COVID-19 compelled  
266 adoption of mask mandates before efficacy could be evaluated. Our findings do not support the  
267 hypothesis that SARS-CoV-2 transmission rates decrease with greater public mask use. As masks are  
268 required in public in many US states, it is prudent to weigh potential benefits with harms. Masks may  
269 promote social cohesion as rallying symbols during a pandemic [31], but risk compensation can also  
270 occur [32]. Prolonged mask use (>4 hours per day) promotes facial alkalinization and inadvertently  
271 encourages dehydration, which in turn can enhance barrier breakdown and bacterial infection risk [33].  
272 British clinicians have reported masks to increase headaches and sweating and decrease cognitive  
273 precision [34]. Survey bias notwithstanding, these sequelae are associated with medical errors [35]. By  
274 obscuring nonverbal communication, masks interfere with social learning in children [36]. Likewise,  
275 masks can distort verbal speech and remove visual cues to the detriment of individuals with hearing loss;  
276 clear face-shields improve visual integration, but there is a corresponding loss of sound quality [37, 38].  
277 Future research is necessary to better understand the risks of long-term daily mask use [30]. Conversely, it

278 is appropriate to emphasize interventions with demonstrated or probable efficacy against COVID-19 such  
279 as vaccination [39] and Vitamin D repletion [40].

280  
281 In summary, mask mandates and use were poor predictors of COVID-19 spread in US states. Case growth  
282 was independent of mandates at low and high rates of community spread, and mask use did not predict  
283 case growth during the Summer or Fall-Winter waves. Strengths of our study include using two mask  
284 metrics to evaluate association with COVID-19 growth rates; measuring normalized case growth in  
285 mandate and non-mandate states at comparable times to quantify the likely effect of mandates; and  
286 deconvolving the effect of mask use by examining case growth in states with variable mask use. Our  
287 study also has key limitations. We did not assess counties or localities, which may trend independently of  
288 state averages. While dense sampling promotes convergence, IHME masking estimates are subject to  
289 survey bias. We only assessed one biological quantity (confirmed and probable COVID-19 infections),  
290 but the ongoing pandemic warrants assessment of other factors such as hospitalizations and mortality.  
291 Future work is necessary to elucidate better predictors of COVID-19 spread. A recent study found that at  
292 typical respiratory fluence rates, medical masks decrease airway deposition of 10-20 $\mu$ m SARS-CoV-2  
293 particles but not 1-5 $\mu$ m SARS-CoV-2 aerosols [41]. Aerosol expulsion increases with COVID-19 disease  
294 severity in non-human primates, as well as with age and BMI in humans without COVID-19 [42].  
295 Aerosol treatment by enhanced ventilation and air purification could help reduce the size of COVID-19  
296 outbreaks.

297

## 298 **Acknowledgments**

299 The authors thank Brandy Jesernik, Jay Bhattacharya, Scott Atlas, and Erik Fostvedt for manuscript input.

300

301

302

## 303 **References**

- 304 1. Zhu N, Zhang D, Wang W, Li X, Yang B, Song J, et al. A Novel Coronavirus from Patients with  
305 Pneumonia in China, 2019. *N Engl J Med.* 2020;382(8):727-33.
- 306 2. Payne DC, Smith-Jeffcoat SE, Nowak G, Chukwuma U, Geibe JR, Hawkins RJ, et al. SARS-CoV-2  
307 Infections and Serologic Responses from a Sample of U.S. Navy Service Members - USS Theodore  
308 Roosevelt, April 2020. *MMWR Morb Mortal Wkly Rep.* 2020;69(23):714-21.
- 309 3. Hojyo S, Uchida M, Tanaka K, Hasebe R, Tanaka Y, Murakami M, et al. How COVID-19 induces  
310 cytokine storm with high mortality. *Inflamm Regen.* 2020;40:37.
- 311 4. Chu Y, Yang J, Shi J, Zhang P, Wang X. Obesity is associated with increased severity of disease in  
312 COVID-19 pneumonia: a systematic review and meta-analysis. *Eur J Med Res.* 2020;25(1):64.
- 313 5. Jayaweera M, Perera H, Gunawardana B, Manatunge J. Transmission of COVID-19 virus by  
314 droplets and aerosols: A critical review on the unresolved dichotomy. *Environ Res.* 2020;188:109819.
- 315 6. Hendrix MJ, Walde C, Findley K, Trotman R. Absence of Apparent Transmission of SARS-CoV-2  
316 from Two Stylists After Exposure at a Hair Salon with a Universal Face Covering Policy - Springfield,  
317 Missouri, May 2020. *MMWR Morb Mortal Wkly Rep.* 2020;69(28):930-2.
- 318 7. Ludvigsson JF, Engerström L, Nordenhäll C, Larsson E. Open Schools, Covid-19, and Child and  
319 Teacher Morbidity in Sweden. *N Engl J Med.* 2021;384(7):669-71.
- 320 8. Bundgaard H, Bundgaard JS, Raaschou-Pedersen DET, von Buchwald C, Todsén T, Norsk JB, et al.  
321 Effectiveness of Adding a Mask Recommendation to Other Public Health Measures to Prevent SARS-CoV-  
322 2 Infection in Danish Mask Wearers : A Randomized Controlled Trial. *Ann Intern Med.* 2021;174(3):335-  
323 43.
- 324 9. MacIntyre CR, Seale H, Dung TC, Hien NT, Nga PT, Chughtai AA, et al. A cluster randomised trial  
325 of cloth masks compared with medical masks in healthcare workers. *BMJ Open.* 2015;5(4):e006577.
- 326 10. MacIntyre CR, Wang Q, Rahman B, Seale H, Ridda I, Gao Z, et al. Efficacy of face masks and  
327 respirators in preventing upper respiratory tract bacterial colonization and co-infection in hospital  
328 healthcare workers. *Prev Med.* 2014;62:1-7.
- 329 11. Howard J, Huang A, Li Z, Tufekci Z, Zdimal V, van der Westhuizen H-M, et al. An evidence review  
330 of face masks against COVID-19. *Proceedings of the National Academy of Sciences.*  
331 2021;118(4):e2014564118.
- 332 12. Wang Y, Tian H, Zhang L, Zhang M, Guo D, Wu W, et al. Reduction of secondary transmission of  
333 SARS-CoV-2 in households by face mask use, disinfection and social distancing: a cohort study in Beijing,  
334 China. *BMJ Glob Health.* 2020;5(5).
- 335 13. Jha AK, Tsai T, Jacobson B. Why we need at least 500,000 tests per day to open the economy —  
336 and stay open: Brown School of Public Health; 2020 [Available from:  
337 [https://globalepidemics.org/2020/04/18/why-we-need-500000-tests-per-day-to-open-the-economy-  
338 and-stay-open/](https://globalepidemics.org/2020/04/18/why-we-need-500000-tests-per-day-to-open-the-economy-and-stay-open/).
- 339 14. United States COVID-19 Cases and Deaths by State over Time. Centers for Disease Control and  
340 Prevention (CDC); 2021.
- 341 15. Guy GP, Jr., Lee FC, Sunshine G, McCord R, Howard-Williams M, Kompaniyets L, et al.  
342 Association of State-Issued Mask Mandates and Allowing On-Premises Restaurant Dining with County-  
343 Level COVID-19 Case and Death Growth Rates - United States, March 1-December 31, 2020. *MMWR  
344 Morb Mortal Wkly Rep.* 2021;70(10):350-4.
- 345 16. Lyu W, Wehby GL. Community Use Of Face Masks And COVID-19: Evidence From A Natural  
346 Experiment Of State Mandates In The US. *Health Aff (Millwood).* 2020;39(8):1419-25.
- 347 17. Institute for Health Metrics and Evaluation COVID-19 model: University of Washington; 2021  
348 [Available from: <https://covid19.healthdata.org/>.

- 349 18. Liu Z, Fang CT. A modeling study of human infections with avian influenza A H7N9 virus in  
350 mainland China. *Int J Infect Dis*. 2015;41:73-8.
- 351 19. Curtis MJ, Alexander S, Cirino G, Docherty JR, George CH, Giembycz MA, et al. Experimental  
352 design and analysis and their reporting II: updated and simplified guidance for authors and peer  
353 reviewers. *British Journal of Pharmacology*. 2018;175(7):987-93.
- 354 20. Khan A, Waleed M, Imran M. Mathematical analysis of an influenza epidemic model,  
355 formulation of different controlling strategies using optimal control and estimation of basic  
356 reproduction number. *Mathematical and Computer Modelling of Dynamical Systems*. 2015;21(5):432-  
357 59.
- 358 21. Samaras L, Sicilia M-A, García-Barriocanal E. Predicting epidemics using search engine data: a  
359 comparative study on measles in the largest countries of Europe. *BMC Public Health*. 2021;21(1):100.
- 360 22. Ghosal S, Sengupta S, Majumder M, Sinha B. Linear Regression Analysis to predict the number of  
361 deaths in India due to SARS-CoV-2 at 6 weeks from day 0 (100 cases - March 14th 2020). *Diabetes Metab*  
362 *Syndr*. 2020;14(4):311-5.
- 363 23. Chu J. A statistical analysis of the novel coronavirus (COVID-19) in Italy and Spain. *PloS one*.  
364 2021;16(3):e0249037.
- 365 24. Anand S, Montez-Rath M, Han J, Bozeman J, Kerschmann R, Beyer P, et al. Prevalence of SARS-  
366 CoV-2 antibodies in a large nationwide sample of patients on dialysis in the USA: a cross-sectional study.  
367 *Lancet (London, England)*. 2020;396(10259):1335-44.
- 368 25. Chan JF, Yuan S, Zhang AJ, Poon VK, Chan CC, Lee AC, et al. Surgical Mask Partition Reduces the  
369 Risk of Noncontact Transmission in a Golden Syrian Hamster Model for Coronavirus Disease 2019  
370 (COVID-19). *Clin Infect Dis*. 2020;71(16):2139-49.
- 371 26. Wu J, Xu F, Zhou W, Feikin DR, Lin CY, He X, et al. Risk factors for SARS among persons without  
372 known contact with SARS patients, Beijing, China. *Emerg Infect Dis*. 2004;10(2):210-6.
- 373 27. Cowling BJ, Chan KH, Fang VJ, Cheng CK, Fung RO, Wai W, et al. Facemasks and hand hygiene to  
374 prevent influenza transmission in households: a cluster randomized trial. *Ann Intern Med*.  
375 2009;151(7):437-46.
- 376 28. Fong MW, Leung NHL, Cowling BJ, Wu P. Upper Respiratory Infections in Schools and Childcare  
377 Centers Reopening after COVID-19 Dismissals, Hong Kong. *Emerg Infect Dis*. 2021;27(5).
- 378 29. Fong MW, Gao H, Wong JY, Xiao J, Shiu EYC, Ryu S, et al. Nonpharmaceutical Measures for  
379 Pandemic Influenza in Nonhealthcare Settings-Social Distancing Measures. *Emerg Infect Dis*.  
380 2020;26(5):976-84.
- 381 30. Jefferson T, Del Mar CB, Dooley L, Ferroni E, Al-Ansary LA, Bawazeer GA, et al. Physical  
382 interventions to interrupt or reduce the spread of respiratory viruses. *Cochrane Database of Systematic*  
383 *Reviews*. 2020(11).
- 384 31. Goh Y, Tan BYQ, Bhartendu C, Ong JY, Sharma VK. The face mask: How a real protection  
385 becomes a psychological symbol during Covid-19? *Brain Behav Immun*. 2020;88:1-5.
- 386 32. Yan Y, Bayham J, Richter A, Fenichel EP. Risk compensation and face mask mandates during the  
387 COVID-19 pandemic. *Scientific Reports*. 2021;11(1):3174.
- 388 33. Hua W, Zuo Y, Wan R, Xiong L, Tang J, Zou L, et al. Short-term skin reactions following use of N95  
389 respirators and medical masks. *Contact Dermatitis*. 2020;83(2):115-21.
- 390 34. Davey SL, Lee BJ, Robbins T, Randeve H, Thake CD. Heat stress and PPE during COVID-19: impact  
391 on healthcare workers' performance, safety and well-being in NHS settings. *J Hosp Infect*. 2021;108:185-  
392 8.
- 393 35. Rosenberg K. The joint commission addresses health care worker fatigue. *Am J Nurs*.  
394 2014;114(7):17.
- 395 36. Spitzer M. Masked education? The benefits and burdens of wearing face masks in schools during  
396 the current Corona pandemic. *Trends Neurosci Educ*. 2020;20:100138.

- 397 37. Corey RM, Jones U, Singer AC. Acoustic effects of medical, cloth, and transparent face masks on  
398 speech signals. *J Acoust Soc Am*. 2020;148(4):2371.
- 399 38. Atcherson SR, Finley ET, Renee McDowell BR, Watson C. More Speech Degradations and  
400 Considerations in the Search for Transparent Face Coverings During the COVID-19 Pandemic. *Audiology*  
401 *Today*. 2020;Nov/Dec.
- 402 39. Polack FP, Thomas SJ, Kitchin N, Absalon J, Gurtman A, Lockhart S, et al. Safety and Efficacy of  
403 the BNT162b2 mRNA Covid-19 Vaccine. *N Engl J Med*. 2020;383(27):2603-15.
- 404 40. Radujkovic A, Hippchen T, Tiwari-Heckler S, Dreher S, Boxberger M, Merle U. Vitamin D  
405 Deficiency and Outcome of COVID-19 Patients. *Nutrients*. 2020;12(9).
- 406 41. Xi J, Si XA, Nagarajan R. Effects of mask-wearing on the inhalability and deposition of airborne  
407 SARS-CoV-2 aerosols in human upper airway. *Phys Fluids* (1994). 2020;32(12):123312.
- 408 42. Edwards DA, Ausiello D, Salzman J, Devlin T, Langer R, Beddingfield BJ, et al. Exhaled aerosol  
409 increases with COVID-19 infection, age, and obesity. *Proceedings of the National Academy of Sciences of*  
410 *the United States of America*. 2021;118(8).

411

412

413

414

415

416

417

418

419

420

421

422

423

424

425

426

427

428

429

430 **Figure Legends**

431 **Fig 1. Mask mandates are not associated with lower COVID-19 growth rates in continental US**

432 **States.** A. Daily COVID-19 case growth rate for continental US states from 20 April 2020 to 6 March  
433 2021. Red horizontal lines denote growth rate minima (Min) and maxima (Max) after the Summer wave.  
434 Surge: difference in case growth between min. and max. Thin black line and wide gray bars denote mean  
435 and 95% confidence intervals, respectively. B. Early mandate states (blue) exhibited greater mask use  
436 than late (green) and no (red) mandate states during the Fall-Winter wave. C. Minimum growth rates were  
437 indistinguishable between early (blue) and combined late and no mandate (orange) states. D. Maximum  
438 growth rates were indistinguishable among early, late, and no mandate states. E-F. Surge sizes (E) and  
439 surge rates (F) were indistinguishable among early, late, and no mandate states. \*:  $p < 0.05$  by Šídák post-  
440 test after one-way ANOVA. n.s.: not significant by Mann-Whitney U test (C) or one-way ANOVA (D-F).  
441 Error bars: 95% confidence intervals.

442  
443 **Fig 2. Statewide mask mandates do not predict lower post-mandate case growth in contiguous US**

444 **states.** A. Case growth was indistinguishable among states with early (blue), late (green), and no (red)  
445 mandates. n.s.: not significant by one-way ANOVA. Error bars: 95% confidence intervals. B. Growth  
446 curves were indistinguishable for states with early (blue), late (green), and no (red) mandates. Heavy lines  
447 and shaded regions denote means and 95% confidence intervals, respectively. Post-mandate case growth  
448 refers to cumulative cases between mandate issuance date and 6 March 2021 (A) or growth curves after  
449 mandate issuance up to 6 March 2021 (B). For states with late and no mandates, effective dates are  
450 medians of issuance dates among bordering states with early mandates.

451  
452 **Fig 3. Mask use does not consistently predict COVID-19 case growth in continental US states.** A.

453 Mask use was associated with lower minimum growth rates. B. First and last mask use quintiles grew  
454 from 400 to 1350 cases per 100,000 at indistinguishable rates before minima. C. Mask use was not



455 associated with maximum growth rates. D. Growth rates and normalized cases were indistinguishable  
456 after maxima between first and last mask use quintiles. E. Mask use was associated with larger surge  
457 sizes. F. Mask use was not associated with surge rates. A, C, E, F: Each SLR includes both Northeast  
458 (solid light blue; ●) and non-Northeast (black; ●) state data. Equations are given when  $p < 0.05$  for the null  
459 hypothesis of zero slope.  $R^2$  values refer to unconstrained lines of best fit.

460  
461 **Fig 4. Mask use does not predict lower COVID-19 growth during the Summer or Fall-Winter**  
462 **waves.** A-B. Daily COVID-19 case growth rate (A) and total COVID-19 cases (B) for US states from 20  
463 April 2020 to 6 March 2021. Red vertical lines denote Summer (Jun-Oct 2020) and Fall-Winter (Oct  
464 2020-Mar 2021) waves. Thin black line and wide gray bars denote mean and 95% confidence intervals,  
465 respectively. C. Higher normalized cases predicted lower Summer case growth in non-Northeast states  
466 (black; ●). D. Higher normalized cases predicted lower Fall-Winter case growth in Northeast (solid light  
467 blue; ●) and non-Northeast (●) continental states. E. Summer case growth was independent of mask use  
468 in non-Northeast states (●). F. Fall-Winter case growth was independent of mask use in Northeast (●) and  
469 non-Northeast (●) continental states. C, E: SLR models exclude Northeast states (○). D, F: SLR models  
470 include both Northeast and non-Northeast continental states. Equations are given when  $p < 0.05$  for the  
471 null hypothesis of zero slope.  $R^2$  values refer to unconstrained lines of best fit.

472

473

474

475

476

477

478

479 **Supporting Information Legends**

480 **S1 Fig. COVID-19 case growth rates in US states with statewide mask mandates issued on or before**

481 **August 2<sup>nd</sup> 2020.** Top. COVID-19 growth phases. Y-axis values are differences between the natural  
482 logarithm of total cases on a day and the natural logarithm of total cases on the prior day. Thin black and  
483 wide gray denote mean and 95% confidence intervals, respectively. Bottom. Individual states. Red  
484 vertical lines denote dates of mask mandate issuance. Red horizontal lines indicate growth rate minima  
485 (phase 4) and maxima (phase 5) after Summer waves.

486

487 **S2 Fig. COVID-19 case growth rates in US states with statewide mask mandates issued after**

488 **August 2<sup>nd</sup> 2020.** Top. COVID-19 growth phases. Y-axis values are differences between the natural  
489 logarithm of total cases on a day and the natural logarithm of total cases on the prior day. Thin black and  
490 wide gray denote mean and 95% confidence intervals, respectively. Bottom. Individual states. Red  
491 vertical lines denote dates of mask mandate issuance. Red horizontal lines indicate growth rate minima  
492 (phase 4) and maxima (phase 5) after Summer waves.

493

494 **S3 Fig. COVID-19 case growth rates in US states without statewide mask mandates.** Top. COVID-

495 19 growth phases. Y-axis values are differences between the natural logarithm of total cases on a day and  
496 the natural logarithm of total cases on the prior day. Thin black and wide gray denote mean and 95%  
497 confidence intervals, respectively. Bottom. Individual states. Red horizontal lines indicate growth rate  
498 minima (phase 4) and maxima (phase 5) after Summer waves.

499

500 **S4 Fig. Total cases, growth rates, and mask use at minima in continental US states.** Left. Normalized

501 cases do not predict mask use at minima. Right. More normalized cases predict lower growth rates in non-  
502 Northeast states at minima. Black circles (●): all states except Hawaii. Blue hollow circles (○): Excluded  
503 Northeast states. Red squares (■): Midwest states. Green triangles (▲): Mountain-Plains States. Grey

504 triangles (▼): South states. Gold diamonds (◆): Pacific states except Hawaii. SLR models include all  
505 states except Hawaii (left) or all states except Hawaii and Northeast states (right).  $R^2$  values refer to  
506 unconstrained lines of best fit.

507  
508 **S5 Fig. Total cases, growth rates, and mask use at minima in continental US states.** Left. Normalized  
509 cases do not predict mask use at maxima. Right. More normalized cases predict lower growth rates in all  
510 continental states at maxima. Black circles (●): all states but Hawaii. Light blue circles (●): Northeast  
511 states. Red squares (■): Midwest states. Green triangles (▲): Mountain-Plains States. Grey triangles (▼):  
512 South states. Gold diamonds (◆): Pacific states but Hawaii. SLR models include all states but Hawaii.  $R^2$   
513 values refer to unconstrained lines of best fit.  $\epsilon$ : Non-normal residuals (D'Agostino-Pearson  $p=0.008$ ).

514  
515 **S1 Table. Total normalized cases, daily case growth, mask use, and statistical tests.** Worksheet A.  
516 Total normalized cases (cases per 100,000 residents of each US state) from 6 March 2020 to 6 March  
517 2021. Total cases obtained from the CDC were divided by 2019 projected state populations and  
518 multiplied by 100,000. Worksheet B. Daily case growth for each US state from 2 April 2020 to 1 March  
519 2021. 7-day rolling averages are given. Red and gold text denote minima and maxima, respectively. Bold,  
520 highlighted text indicate actual mandate issuance dates for early and late mandate states (yellow highlight,  
521 bold red) and effective mandate issuance dates for late and no mandate states (blue highlight, bold  
522 orange). Worksheet C. Mask use for each US state on specified dates or ranges of dates. Date range mask  
523 use values are simple arithmetic means of daily mask use over the specified date range. Blue and red text  
524 indicate states in the first and last mask use quintile, respectively (i.e., states with highest and lowest  
525 mean mask use between 1 June 2020 and 1 March 2021). Mask use data are estimates provided by the  
526 University of Washington Institute for Health Metrics and Evaluation. Worksheet D. Statistical test  
527 summaries. Tests are reported in the order they appear in the Results. Red text specifies model  
528 assumption violations, followed by alternative tests that fulfill assumptions. All reported statistics and  
529 parameters were calculated with GraphPad Prism 9.1 (Prism files available upon request).

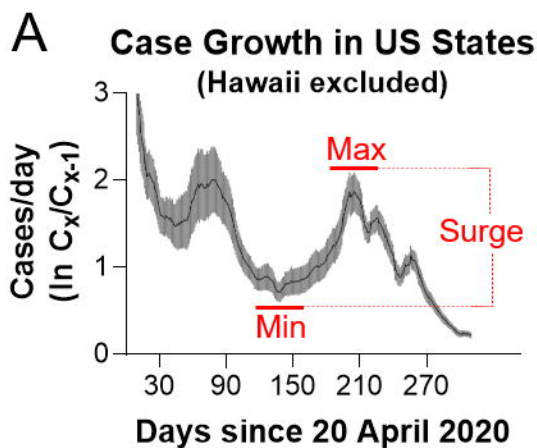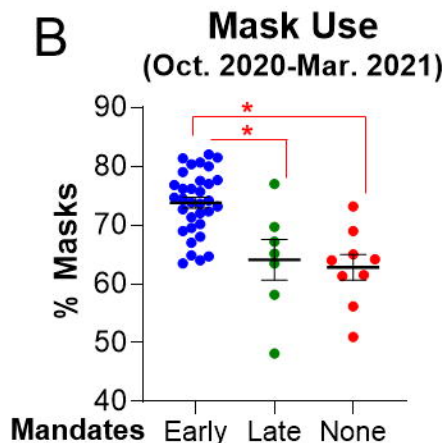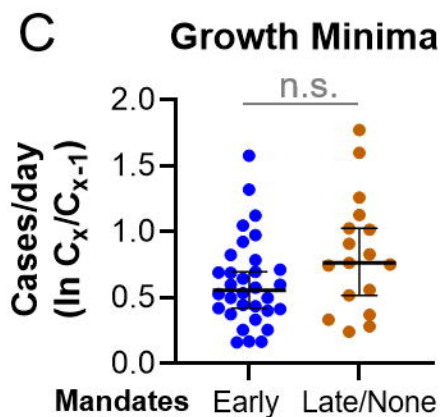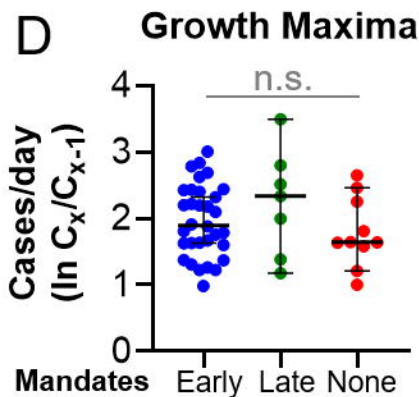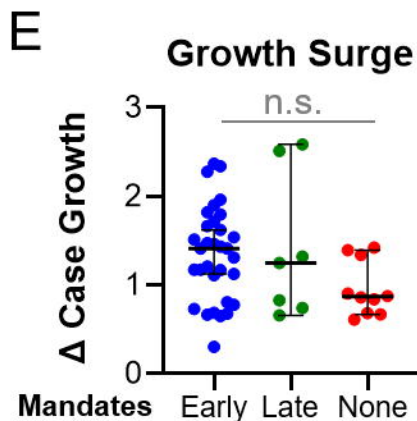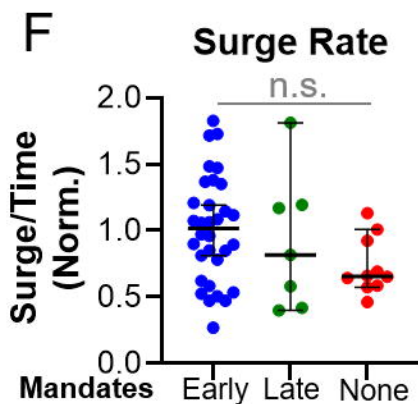

A

## Growth After Early Mandates

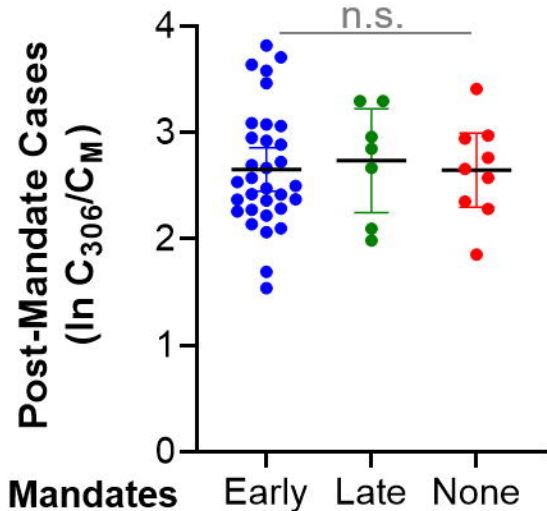

B

## Post-Mandate Growth Curves

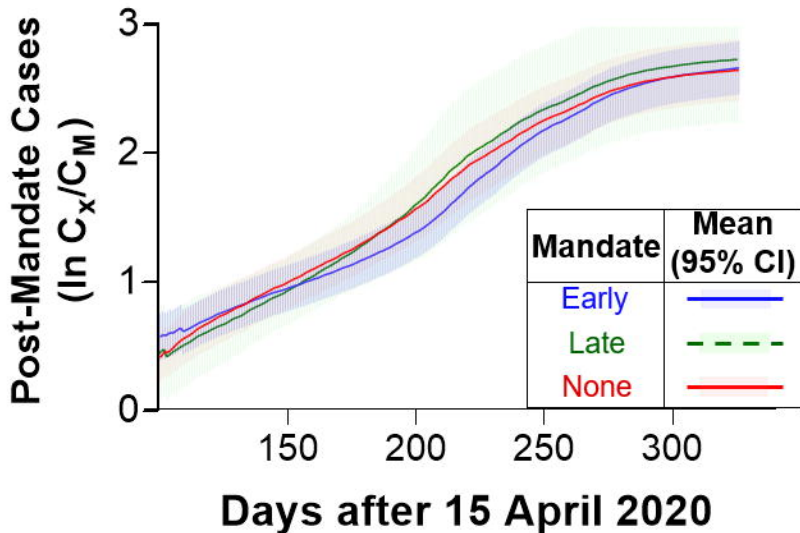

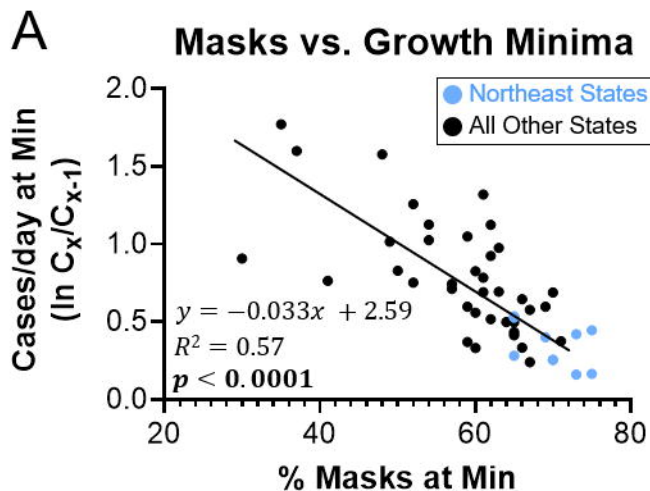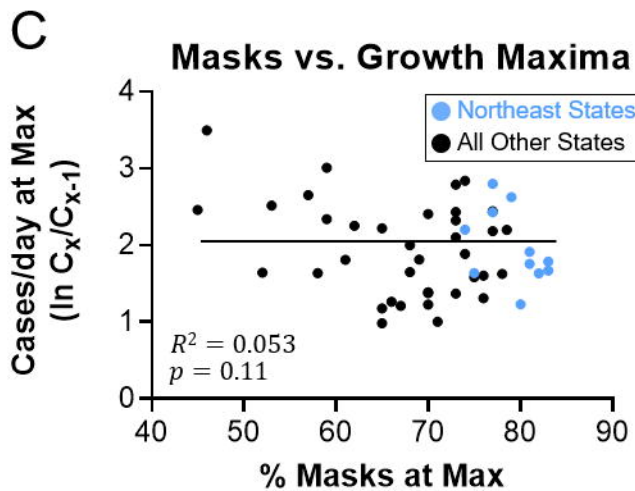

### B Total Cases Before Minima

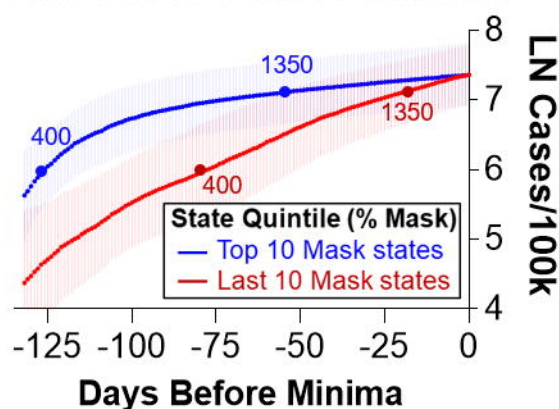

|                                 | Mean $\pm$ 95% CI |                 |                 |
|---------------------------------|-------------------|-----------------|-----------------|
| Total Cases                     | Top 10            | Last 10         | $p$ -value      |
| Case Growth 400-1350 cases/100k | 57.7 $\pm$ 18.4   | 65.3 $\pm$ 16.1 | 0.49 (t-test)   |
| % Masks 400-1350 cases/100k     | 66.3 $\pm$ 3.5    | 43.1 $\pm$ 4.7  | <0.001 (t test) |

### D Total Cases After Maxima

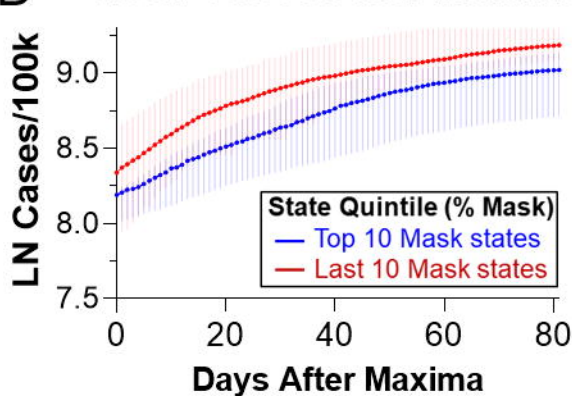

| Total Cases           | Top 10         | Last 10        | $p$ -value         |
|-----------------------|----------------|----------------|--------------------|
| Median (95% CI)       |                |                |                    |
| Case Growth 0-80 days | 0.88           | 0.87           | 0.85 (M-W)         |
| Median (95% CI)       | 0.82-0.95      | 0.66-1.2       |                    |
| % Masks 0-80 days     | 81.8 $\pm$ 1.8 | 63.1 $\pm$ 4.3 | <0.001 (Welch's t) |
| Mean $\pm$ 95% CI     |                |                |                    |

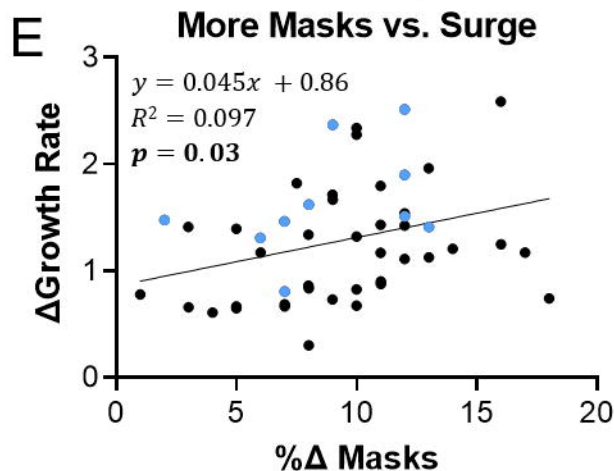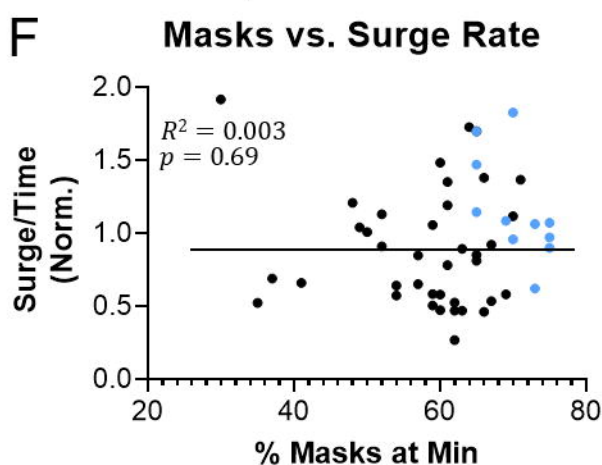

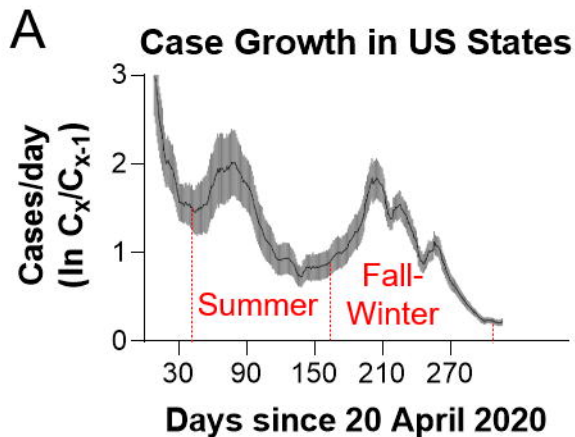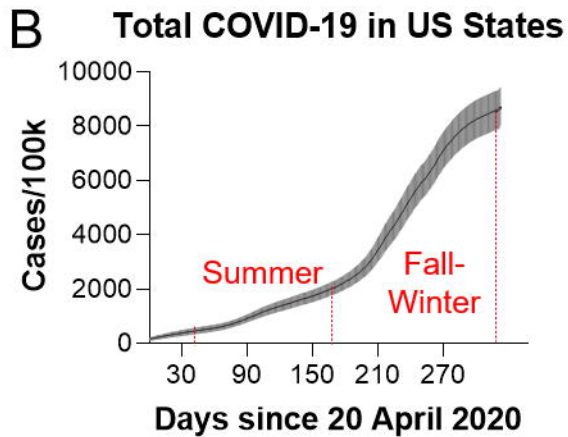

● Northeast States ○ Northeast (Excluded) ● All Other States

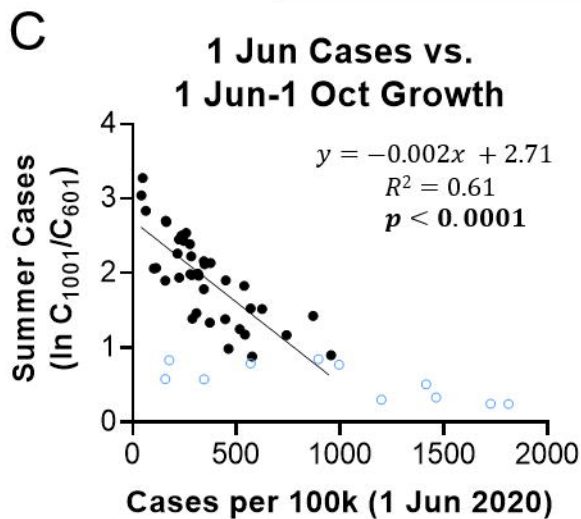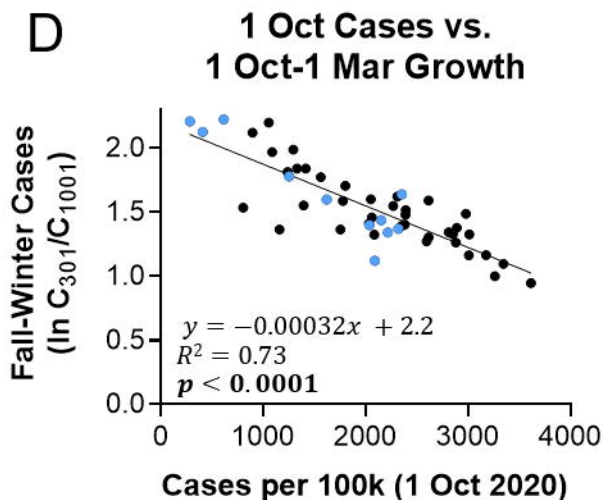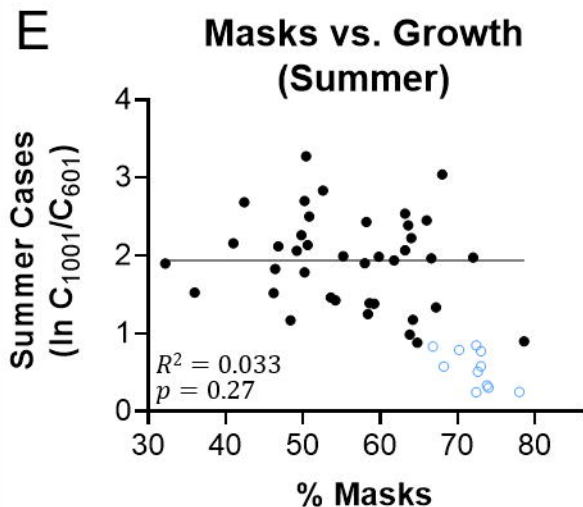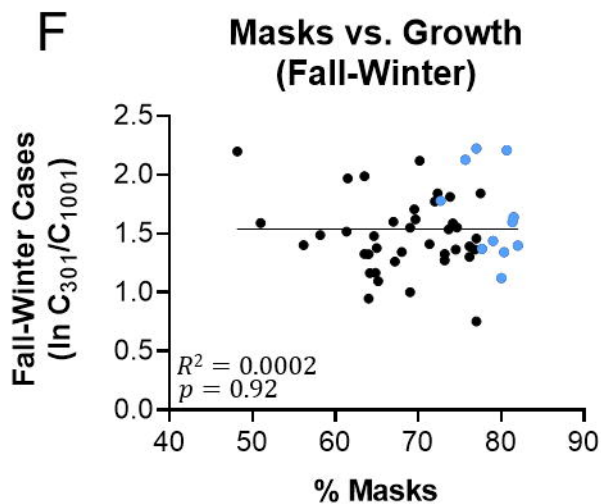

Source: https://www.medrxiv.org/content/10.1101/2021.05.18.21257385v1.full.pdf
