# Supplementary material for: Mask mandate and use efficacy for COVID-19 containment in US States
Source: bioRxiv or medRxiv preprint supplement (doi:10.1101/2021.05.18.21257385), 2021-08-06
Supplement: Supplementary file [file media-1.pdf]

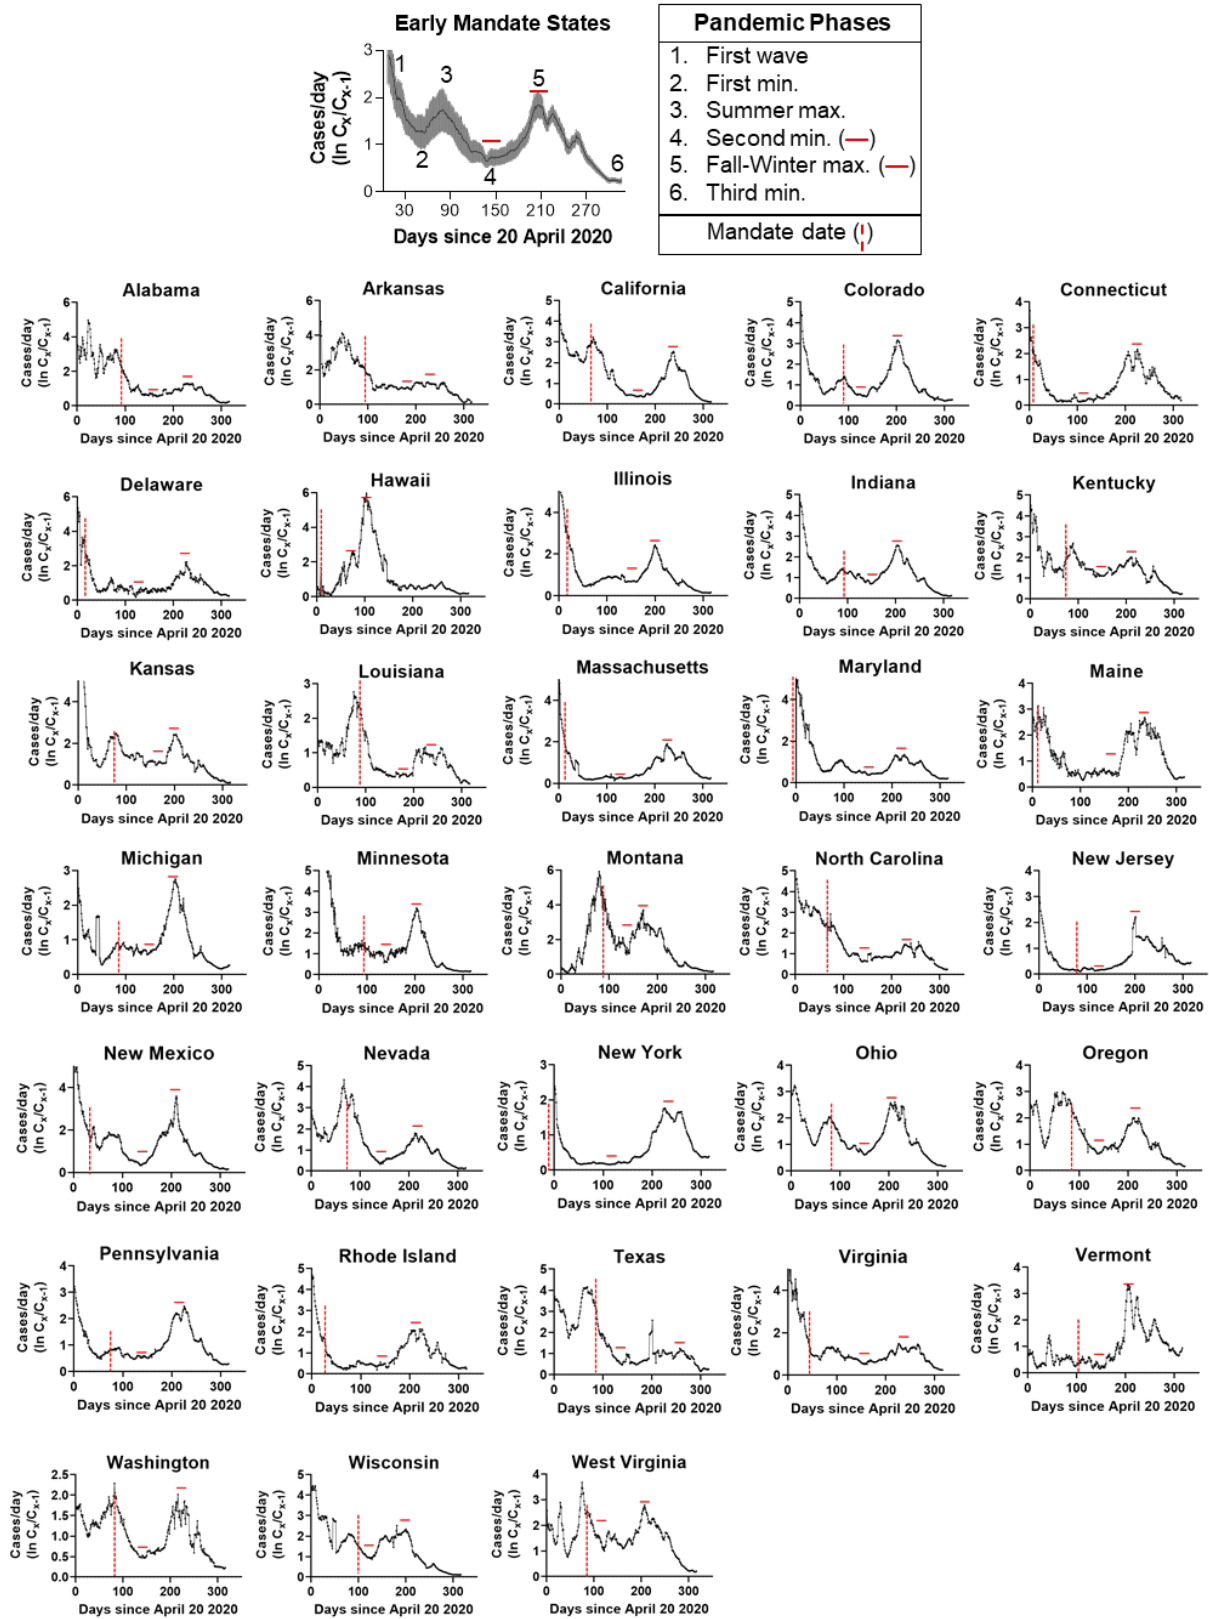

3 S2 Fig

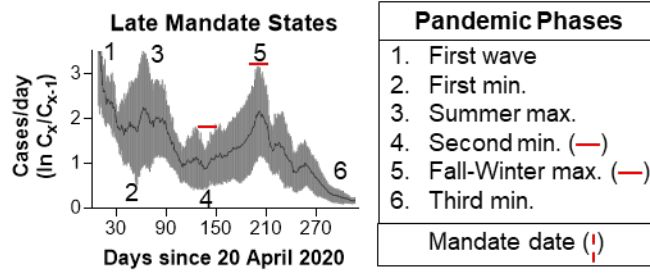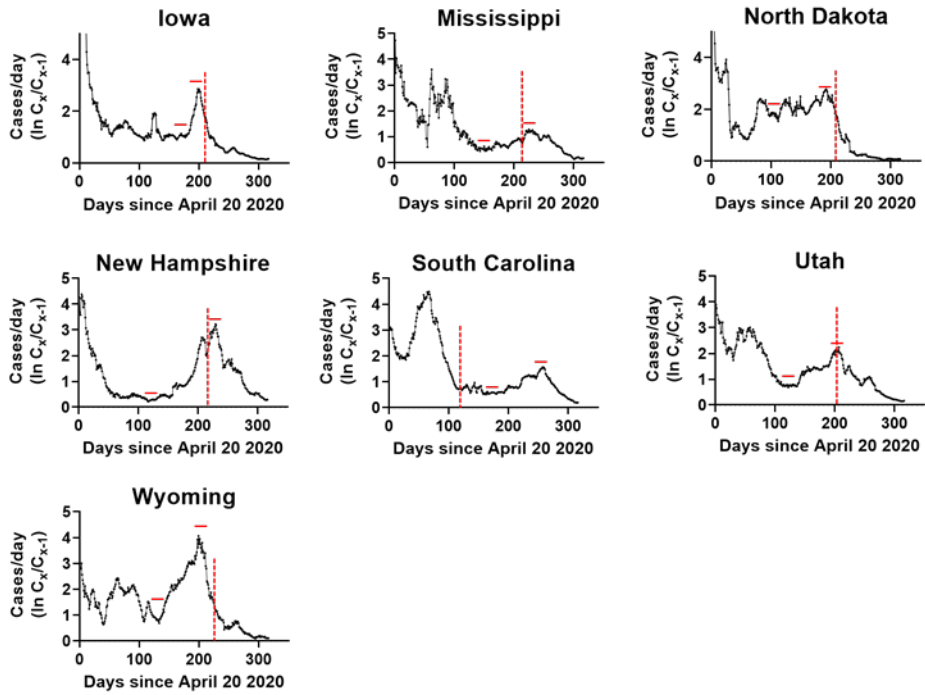

4  
5  
6  
7  
8  
9  
10  
11  
12  
13  
14

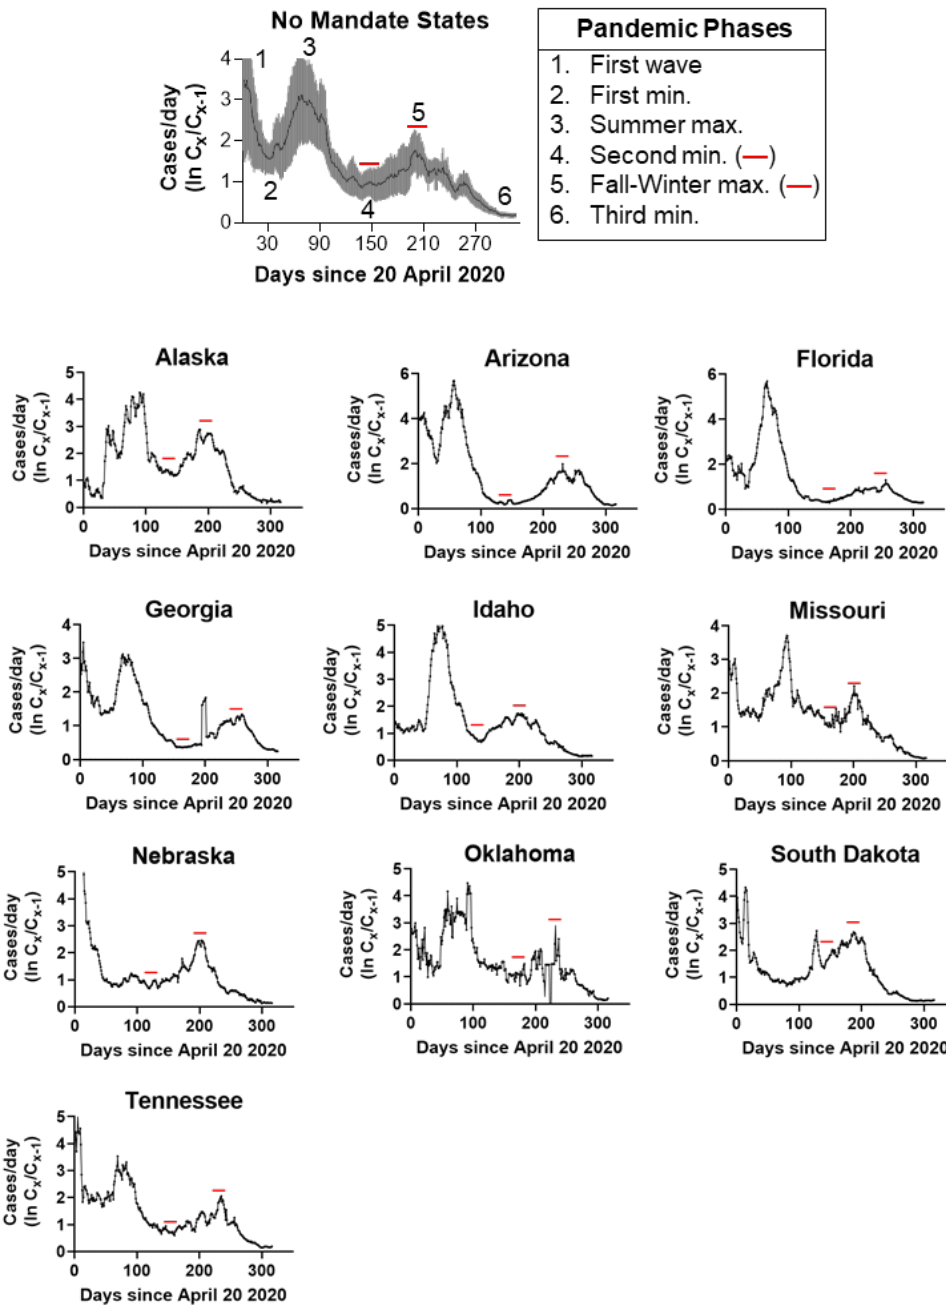

16  
 17  
 18  
 19  
 20  
 21

22 S4 Fig

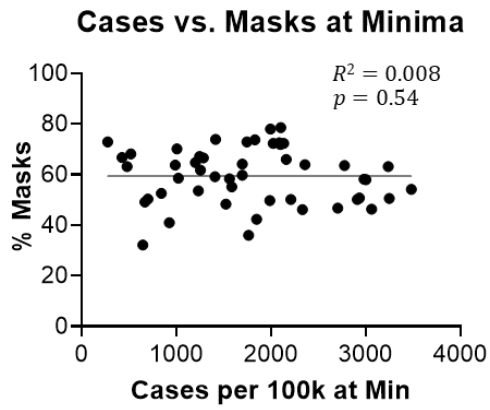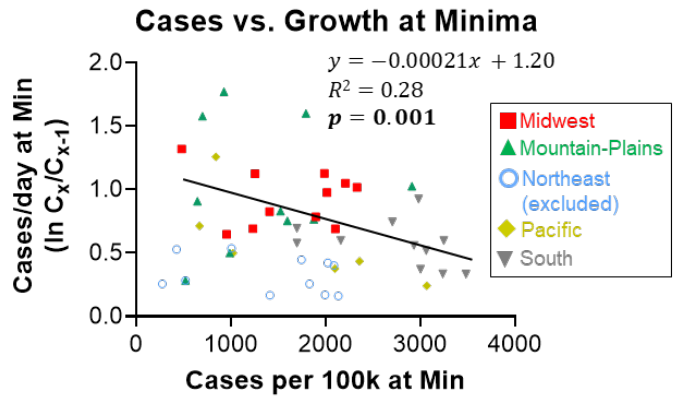

23  
24  
25  
26  
27  
28  
29  
30  
31  
32  
33  
34  
35  
36  
37  
38  
39  
40  
41  
42  
43  
44

45 S5 Fig

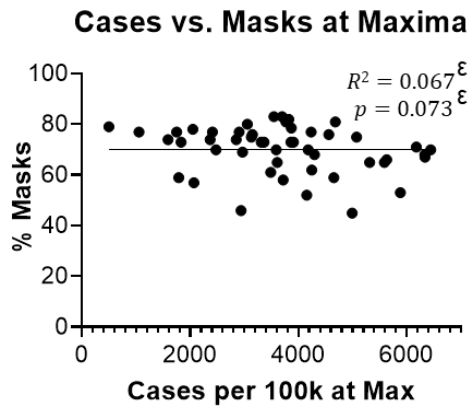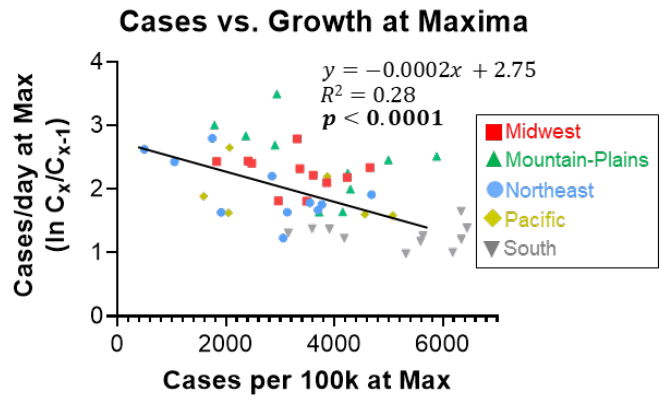

46

47
